# Supplementary material for: Evaluation of the Synthetic Multifunctional Peptide Hp-MAP3 Derivative of Temporin-PTa
Source: MDPI journal article supplement (doi:10.3390/toxins15010042), 2023-01-05
Supplement: s1 [file s1]

## Supplementary Materials: Evaluation of the Synthetic Multifunctional Peptide Hp-MAP3 Derivative of Temporin-PTa

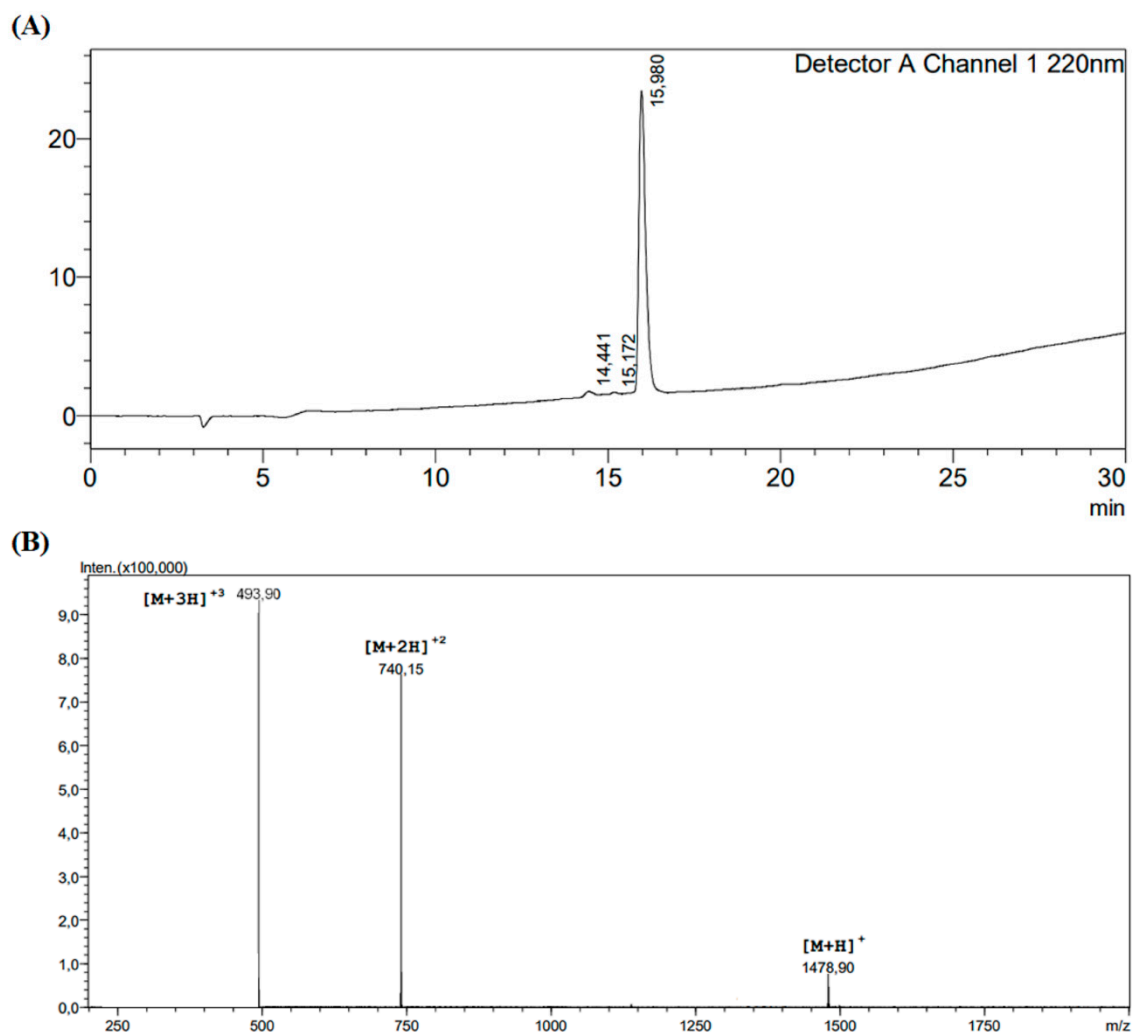

**Figura S1:** Purification and confirmation of the molecular mass of the Hp-MAP3 peptide. **(A)** Profile Purification by reversed phase high performance liquid chromatography (RP-HPLC) to >95% purity. **(B)** Electrospray ionization mass spectrometry (ESI-MS) The profile represents monoisotopic masses  $[M+H]^+$  of 1.478 Da respectively.

**Table S1:** Antibigram assay against certain bacteria. (+) resistant at the concentrations tested.

| <b>Microorganism</b>                                  | Amoxicillin           | Imipenem              | Erythromycin          | Ampicillin            |
|-------------------------------------------------------|-----------------------|-----------------------|-----------------------|-----------------------|
| <b>Gram-negative</b>                                  | <b>&gt;350.3 (μM)</b> | <b>&gt;427.6 (μM)</b> | <b>&gt;174.4 (μM)</b> | <b>&gt;366.3 (μM)</b> |
| <i>Acinetobacter baumannii</i><br>(clinical isolated) | +                     | +                     | +                     | +                     |
| <i>Escherichia coli</i> (clinical<br>isolated)        | +                     | +                     | +                     | +                     |
| <i>Escherichia coli</i> (KPC)                         | +                     | +                     | +                     | +                     |
| <i>Klebsiella pneumoniae</i><br>(ATCC)                | +                     | +                     | +                     | +                     |
| <i>Klebsiella pneumoniae</i><br>(KPC)                 | +                     | +                     | +                     | +                     |
| <i>Pseudomonas aeruginosa</i><br>(ATCC)               | +                     | +                     | +                     | +                     |
| <b>Gram-positive</b>                                  |                       |                       |                       |                       |
| <i>Staphylococcus aureus</i><br>(clinical isolated)   | +                     | +                     | +                     | +                     |
